# Supplementary material for: Predicting Regions of Local Recurrence in Glioblastomas Using Voxel-Based Radiomic Features of Multiparametric Postoperative MRI
Source: MDPI journal article supplement (doi:10.3390/cancers15061894), 2023-03-22
Supplement: s1 [file s1]

## **Supplementary Material**

### **Table of contents**

|                                                                               |        |
|-------------------------------------------------------------------------------|--------|
| Table S1. MRI acquisition parameters used by participating institutions ..... | Page 2 |
| Table S2. Pyradiomics settings used for voxel-wise feature extraction.....    | Page 3 |

| <b>Table S1. MRI acquisition parameters used by participating institutions</b>                                                                                                                                                                                                                                                                                                           |                                                                                                                              |                                                                                                                               |                                                                                                                           |                                                                                                                           |                                                                                                                           |
|------------------------------------------------------------------------------------------------------------------------------------------------------------------------------------------------------------------------------------------------------------------------------------------------------------------------------------------------------------------------------------------|------------------------------------------------------------------------------------------------------------------------------|-------------------------------------------------------------------------------------------------------------------------------|---------------------------------------------------------------------------------------------------------------------------|---------------------------------------------------------------------------------------------------------------------------|---------------------------------------------------------------------------------------------------------------------------|
| <b>MRI Sequence</b>                                                                                                                                                                                                                                                                                                                                                                      | <b>Rio Hortega University Hospital, Valladolid, Spain</b>                                                                    | <b>12 de Octubre University Hospital, Madrid, Spain</b>                                                                       | <b>St. Olavs University Hospital, Trondheim Norway</b>                                                                    | <b>Case Western Reserve University, Cleveland, USA</b>                                                                    | <b>University of Pennsylvania, Philadelphia, USA</b>                                                                      |
| Manufacturer, model and Field strength                                                                                                                                                                                                                                                                                                                                                   | General Electric, Signa HDxT, 1.5 T                                                                                          | General Electric, Signa Premier, 3 T                                                                                          | Siemens, Skyra, 3 T                                                                                                       | Siemens, Avanto, 1.5 T                                                                                                    | Siemens, TrioTim, 3 T                                                                                                     |
| T1ce                                                                                                                                                                                                                                                                                                                                                                                     | TR/TE/FA, 7.98 ms/2.57 ms/12°; 3D; GRE; FOV, 220 x 220 mm; matrix, 512 x 512; slice thickness, 1 mm                          | TR/TE/FA, 6.82 ms/2.16 ms/12°; 3D; FSPGRE; FOV, 320 x 320 mm; matrix, 512 x 512; slice thickness, 1 mm                        | TR/TE/FA, 2000 ms/2.96 ms/8°; 3D; MPRAGRE; FOV, 256 x 256 mm; matrix, 256x 256; slice thickness, 1 mm                     | TR/TE, 589 ms/12 ms; 2D; TSE; FOV, 256 x 256 mm; matrix, 256x 179; slice thickness, 5 mm                                  | TR/TE, 1760 ms/3.11 ms; 3D; GRE; FOV, 256 x 187 mm; matrix, 256x 192; slice thickness, 1 mm                               |
| T1w                                                                                                                                                                                                                                                                                                                                                                                      | TR/TE, 580 ms/7.56 ms; 2D; FSE; FOV, 220 x 220 mm; matrix, 512 x 512; slice thickness, 5 mm                                  | TR/TE/FA, 6.85 ms/2.12 ms/12°; 3D; FSPGRE; FOV, 320 x 320 mm; matrix, 512 x 512; slice thickness, 5 mm                        | TR/TE/FA, 2000 ms/2.96 ms/8°; 3D; MPRAGRE; FOV, 256 x 256 mm; matrix, 256 x 256; slice thickness, 1 mm                    | TR/TE, 529 ms/12 ms; 2D; TSE; FOV, 256 x 224 mm; matrix, 256 x 224; slice thickness, 5 mm                                 | TR/TE, 1760 ms/3.11 ms; 3D; GRE; FOV, 187 x 250 mm; matrix, 256 x 192; slice thickness, 1 mm                              |
| T2w                                                                                                                                                                                                                                                                                                                                                                                      | TR/TE, 5220 ms/96.12 ms; 2D; FRSE; FOV, 220 x 220 mm; matrix, 512 x 512; slice thickness, 5 mm.                              | TR/TE, 4322 ms/124.25 ms; 2D; FSE; FOV, 256 x 256 mm; matrix, 512 x 512; slice thickness, 4 mm                                | TR/TE, 4200 ms/88 ms; 2D; TSE; FOV, 256 x 256 mm; matrix, 512 x 359; slice thickness, 3 mm                                | TR/TE, 5000 ms/91 ms; 2D; TSE; FOV, 256 x 224 mm; matrix, 256 x 224; slice thickness, 5 mm                                | TR/TE, 5340 ms/85 ms; 2D; TSE; FOV, 240 x 195 mm; matrix, 256 x 208; slice thickness, 3 mm                                |
| FLAIR                                                                                                                                                                                                                                                                                                                                                                                    | TR/TE, 8002 ms/135.07 ms; 2D; FSE; FOV, 220 x 220 mm; matrix, 512 x 512; slice thickness, 4 mm                               | TR/TE, 9350 ms/142.56 ms; 2D; FSE; FOV, 320 x 224 mm; matrix, 512 x 512; slice thickness, 4 mm                                | TR/TE, 9000 ms/108 ms; 3D; TSE; FOV, 256 x 256mm; matrix, 256 x 256; slice thickness, 1 mm                                | TR/TE, 9000 ms/109 ms; 2D; TSE; FOV, 256 x 208 mm; matrix, 256 x 208; slice thickness, 5 mm                               | TR/TE, 9420 ms/141 ms; 2D; TSE; FOV, 240 x 180 mm; matrix, 256 x 192; slice thickness, 3 mm                               |
| DWI                                                                                                                                                                                                                                                                                                                                                                                      | TR/TE, 8000 ms/111.7 ms; FOV, 256 x 256 mm; matrix, 128 x 160; slice thickness, 5 mm; b-values, 0 and 1000 s/mm <sup>2</sup> | TR/TE, 3780 ms/57.2 ms; FOV, 256 x 256 mm; matrix, 160 x 160; slice thickness, 3.5 mm; b-values, 0 and 1000 s/mm <sup>2</sup> | TR/TE, 8130 ms/64 ms; FOV, 160 x 160 mm; matrix, 160 x 160; slice thickness, 3 mm; b-values, 0 and 1000 s/mm <sup>2</sup> | TR/TE, 4700 ms/89 ms; FOV, 160 x 160 mm; matrix, 160 x 160; slice thickness, 5 mm; b-values, 0 and 1000 s/mm <sup>2</sup> | TR/TE, 5000 ms/86 ms; FOV, 192 x 192 mm; matrix, 192 x 192; slice thickness, 3 mm; b-values, 0 and 1000 s/mm <sup>2</sup> |
| T1ce = contrast-enhanced T1w, T2w= T2-weighted image, FLAIR = Fluid-attenuated inversion recovery, DWI = diffusion weighted image, TR = repetition time, TE= echo time, FOV = field of view. GRE = gradient echo. TSE = turbo spin echo. FSE= fast spin echo. FRFSE= fast recovery fast spin echo. FSPGR= Fast Spoiled Gradient Echo. MPRAGE= Magnetization Prepared Rapid Gradient Echo |                                                                                                                              |                                                                                                                               |                                                                                                                           |                                                                                                                           |                                                                                                                           |

| Table S2. Pyradiomics settings used for voxel-wise feature extraction |                                                                                                                                                                                                                                                                                                                                                                                                                                                                                                                                                                                                                                                                                                                                                                                                                                                                                                                                                                                                                                                                                                                                                                                                                                                                                                                                                                                                                                                                                                                                                                                                                                                                                                                                                                                                                                                                                                                                                                                                                                                                                                                                                                                                                                                                                                                                                                                                                                                                                                 |
|-----------------------------------------------------------------------|-------------------------------------------------------------------------------------------------------------------------------------------------------------------------------------------------------------------------------------------------------------------------------------------------------------------------------------------------------------------------------------------------------------------------------------------------------------------------------------------------------------------------------------------------------------------------------------------------------------------------------------------------------------------------------------------------------------------------------------------------------------------------------------------------------------------------------------------------------------------------------------------------------------------------------------------------------------------------------------------------------------------------------------------------------------------------------------------------------------------------------------------------------------------------------------------------------------------------------------------------------------------------------------------------------------------------------------------------------------------------------------------------------------------------------------------------------------------------------------------------------------------------------------------------------------------------------------------------------------------------------------------------------------------------------------------------------------------------------------------------------------------------------------------------------------------------------------------------------------------------------------------------------------------------------------------------------------------------------------------------------------------------------------------------------------------------------------------------------------------------------------------------------------------------------------------------------------------------------------------------------------------------------------------------------------------------------------------------------------------------------------------------------------------------------------------------------------------------------------------------|
| Image Type Filter                                                     | Original: {}<br>Wavelet: {}<br>LBP3D:<br>binWidth: 1.0<br>LoG:<br>sigma: [1.0, 3.0, 5.0 ]                                                                                                                                                                                                                                                                                                                                                                                                                                                                                                                                                                                                                                                                                                                                                                                                                                                                                                                                                                                                                                                                                                                                                                                                                                                                                                                                                                                                                                                                                                                                                                                                                                                                                                                                                                                                                                                                                                                                                                                                                                                                                                                                                                                                                                                                                                                                                                                                       |
| Feature Class                                                         | First order: <ul style="list-style-type: none"> <li>- Energy</li> <li>- Total energy</li> <li>- Entropy</li> <li>- Minimum</li> <li>- 10<sup>th</sup> percentile</li> <li>- 90<sup>th</sup> percentile</li> <li>- Maximum</li> <li>- Mean</li> <li>- Median</li> <li>- Interquartile Range</li> <li>- Range</li> <li>- Mean Absolute Deviation</li> <li>- Root mean squared</li> <li>- Standard deviation</li> <li>- Skewness</li> <li>- Kurtosis</li> <li>- Variance</li> <li>- Uniformity</li> </ul> Gray Level Co-occurrence Matrix (GLCM): <ul style="list-style-type: none"> <li>- Autocorrelation</li> <li>- Joint Average</li> <li>- Cluster Prominence</li> <li>- Cluster Shade</li> <li>- Cluster Tendency</li> <li>- Contrast</li> <li>- Correlation</li> <li>- Difference Average</li> <li>- Difference Entropy</li> <li>- Difference Variance</li> <li>- Joint Energy</li> <li>- Joint Entropy</li> <li>- Informational Measure of Correlation (IMC) 1</li> <li>- Informational Measure of Correlation (IMC) 2</li> <li>- Inverse Difference Moment (IDM)</li> <li>- Inverse Difference Moment Normalized (IDMN)</li> <li>- Inverse Difference</li> <li>- Inverse Difference Normalized</li> <li>- Inverse Variance</li> <li>- Maximum Probability</li> <li>- Sum Entropy</li> <li>- Sum Squares</li> </ul> Gray Level Run Length Matrix (GLRLM): <ul style="list-style-type: none"> <li>- Short Run Emphasis (SRE)</li> <li>- Long Run Emphasis (LRE)</li> <li>- Gray Level Non-Uniformity (GLN)</li> <li>- Gray Level Non-Uniformity Normalized (GLNN)</li> <li>- Run Length Non-Uniformity (RLN)</li> <li>- Run Length Non-Uniformity Normalized (RLNN)</li> <li>- Run Percentage (RP)</li> <li>- Gray Level Variance (GLV)</li> <li>- Run Variance (RV)</li> <li>- Run Entropy (RE)</li> <li>- Low Gray Level Run Emphasis (LGLRE)</li> <li>- High Gray Level Run Emphasis (HGLRE)</li> <li>- Short Run Low Gray Level Emphasis (SRLGLE)</li> <li>- Short Run High Gray Level Emphasis (SRHGLE)</li> <li>- Long Run Low Gray Level Emphasis (LRLGLE)</li> <li>- Long Run High Gray Level Emphasis (LRHGLE)</li> </ul> Gray Level Size Zone Matrix (GLSZM): <ul style="list-style-type: none"> <li>- Small Area Emphasis (SAE)</li> <li>- Large Area Emphasis (LAE)</li> <li>- Gray Level Non-Uniformity (GLN)</li> <li>- Gray Level Non-Uniformity Normalized (GLNN)</li> <li>- Size-Zone Non-Uniformity (SZN)</li> <li>- Size-Zone Non-Uniformity Normalized (SZNN)</li> </ul> |

|                |                                                                                                                                                                                                                                                                                                                                                                                                                                                                                                                                                                                                                                                                                                                                                                                                                                                                                                                                                                                                                                                                                                                                                                                                                                                                                                                                                                                                                                                                                                |
|----------------|------------------------------------------------------------------------------------------------------------------------------------------------------------------------------------------------------------------------------------------------------------------------------------------------------------------------------------------------------------------------------------------------------------------------------------------------------------------------------------------------------------------------------------------------------------------------------------------------------------------------------------------------------------------------------------------------------------------------------------------------------------------------------------------------------------------------------------------------------------------------------------------------------------------------------------------------------------------------------------------------------------------------------------------------------------------------------------------------------------------------------------------------------------------------------------------------------------------------------------------------------------------------------------------------------------------------------------------------------------------------------------------------------------------------------------------------------------------------------------------------|
|                | <ul style="list-style-type: none"> <li>- Zone Percentage (ZP)</li> <li>- Gray Level Variance (GLV)</li> <li>- Zone Variance (ZV)</li> <li>- Zone Entropy (ZE)</li> <li>- Low Gray Level Zone Emphasis (LGLZE)</li> <li>- High Gray Level Zone Emphasis (HGLZE)</li> <li>- Small Area Low Gray Level Emphasis (SALGLE)</li> <li>- Small Area High Gray Level Emphasis (SAHGLE)</li> <li>- Large Area Low Gray Level Emphasis (LALGLE)</li> <li>- Large Area High Gray Level Emphasis (LAHGLE)</li> </ul> <p>Neighbouring Gray Tone Difference Matrix (NGTDM):</p> <ul style="list-style-type: none"> <li>- Coarseness</li> <li>- Contrast</li> <li>- Busyness</li> <li>- Complexity</li> <li>- Strength</li> </ul> <p>Gray Level Dependence Matrix (GLDM):</p> <ul style="list-style-type: none"> <li>- Small Dependence Emphasis (SDE)</li> <li>- Large Dependence Emphasis (LDE)</li> <li>- Gray Level Non-Uniformity (GLN)</li> <li>- Dependence Non-Uniformity (DN)</li> <li>- Dependence Non-Uniformity Normalized (DNN)</li> <li>- Gray Level Variance (GLV)</li> <li>- Dependence Variance (DV)</li> <li>- Dependence Entropy (DE)</li> <li>- Low Gray Level Emphasis (LGLE)</li> <li>- High Gray Level Emphasis (HGLE)</li> <li>- Small Dependence Low Gray Level Emphasis (SDLGLE)</li> <li>- Small Dependence High Gray Level Emphasis (SDHGLE)</li> <li>- Large Dependence Low Gray Level Emphasis (LDLGLE)</li> <li>- Large Dependence High Gray Level Emphasis (LDHGLE)</li> </ul> |
| Settings:      | normalize: true<br>normalizeScale: 100<br>binWidth: 25<br>interpolator: 'sitkBSpline'<br>resampledPixelSpacing: [1, 1, 1]<br>correctMask: true<br>voxelArrayShift: 300<br>force2D: true<br>force2Ddimension: 0                                                                                                                                                                                                                                                                                                                                                                                                                                                                                                                                                                                                                                                                                                                                                                                                                                                                                                                                                                                                                                                                                                                                                                                                                                                                                 |
| Voxel settings | kernelRadius: 1 [3 x 3 x 3]<br>maskedKernel: true<br>voxelBatch: 10000                                                                                                                                                                                                                                                                                                                                                                                                                                                                                                                                                                                                                                                                                                                                                                                                                                                                                                                                                                                                                                                                                                                                                                                                                                                                                                                                                                                                                         |
